# Supplementary material for: Nebulized hypertonic saline triggers nervous system-mediated active liquid secretion in cystic fibrosis swine trachea
Source: PubMed Central journal article supplement (PMC6345831; doi:10.1038/s41598-018-36695-4), 2019-01-24
Supplement: 41598_2018_36695_MOESM1_ESM.pdf [file 41598_2018_36695_MOESM1_ESM.pdf]

**Title:** Nebulized hypertonic saline triggers nervous system-mediated active liquid secretion in cystic fibrosis swine trachea

***Authors and affiliations***

Xiaojie Luan<sup>1</sup>, Julian S. Tam<sup>2</sup>, George Belev<sup>3</sup>, Santosh Jagadeeshan<sup>1</sup>, Brendan Murray<sup>1</sup>, Noman Hassan<sup>1</sup>, Terry E. Machen<sup>4</sup>, L. Dean Chapman<sup>5</sup>, and Juan P. Ianowski<sup>1</sup>

1. University of Saskatchewan, Department of Physiology, Health Science Building, Room 2D01, 107 Wiggins Rd., Saskatoon, Saskatchewan, S7N 5E5, Canada.

2. University of Saskatchewan, Department of Medicine, Division of Respiriology, Critical Care, and Sleep Medicine. Royal University Hospital, 103 Hospital Drive, Saskatoon, Saskatchewan, S7N 0W8, Canada

3. Canadian Light Source Inc., 44 Innovation Boulevard, Saskatoon, Saskatchewan, S7N 2V3, Canada.

4. University of California, Department of Molecular and Cell Biology, 231 LSA, Berkeley, CA, 94720-3200

5. University of Saskatchewan, Department of Anatomy and Cell Biology, Health Science Building, Room 2D01, 107 Wiggins Rd., Saskatoon, Saskatchewan, S7N 5E5, Canada.

Table 1: ASL measurements in wild-type swine *in vivo*

| Group                | ASL layer height ( $\mu\text{m}$ ) Mean $\pm$ SEM |                       |                               |                       |                                |                       |                                |
|----------------------|---------------------------------------------------|-----------------------|-------------------------------|-----------------------|--------------------------------|-----------------------|--------------------------------|
|                      | Initial (-3 min)                                  | 6 min                 | $\Delta$ height (-3 to 6 min) | 12 min                | $\Delta$ height (-3 to 12 min) | 18 min                | $\Delta$ height (-3 to 18 min) |
| HTS<br>n=6           | 142.29<br>$\pm$ 30.66                             | 165.29<br>$\pm$ 23.53 | 23.00<br>$\pm$ 10.92          | 197.42<br>$\pm$ 27.88 | 55.13<br>$\pm$ 9.63            | 237.25<br>$\pm$ 26.12 | 94.96<br>$\pm$ 18.56           |
| ITS<br>n=6           | 176.83<br>$\pm$ 29.93                             | 188.54<br>$\pm$ 33.93 | 11.71<br>$\pm$ 5.07           | 198.42<br>$\pm$ 35.22 | 21.58<br>$\pm$ 6.59            | 210.83<br>$\pm$ 34.30 | 34.00<br>$\pm$ 5.58            |
| HTS+Atro+Lido<br>n=6 | 180.13<br>$\pm$ 26.42                             | 192.58<br>$\pm$ 30.43 | 12.46<br>$\pm$ 7.22           | 220.42<br>$\pm$ 30.90 | 40.29<br>$\pm$ 9.36            | 242.38<br>$\pm$ 28.50 | 62.25<br>$\pm$ 8.65            |
| ITS+Atro+Lido<br>n=5 | 161.45<br>$\pm$ 30.44                             | 165.85<br>$\pm$ 29.07 | 4.40<br>$\pm$ 2.69            | 171.55<br>$\pm$ 29.92 | 10.10<br>$\pm$ 3.52            | 186.05<br>$\pm$ 30.40 | 24.60<br>$\pm$ 6.66            |
| HTS+Capsaicin<br>n=6 | 121.00<br>$\pm$ 20.93                             | 152.50<br>$\pm$ 18.96 | 31.50<br>$\pm$ 10.97          | 192.67<br>$\pm$ 27.93 | 71.67<br>$\pm$ 19.94           | 228.13<br>$\pm$ 25.64 | 107.13<br>$\pm$ 15.02          |
| ITS+Capsaicin<br>n=5 | 118.10<br>$\pm$ 35.30                             | 135.65<br>$\pm$ 38.05 | 17.55<br>$\pm$ 5.06           | 151.00<br>$\pm$ 38.82 | 32.90<br>$\pm$ 6.44            | 181.25<br>$\pm$ 34.05 | 63.15<br>$\pm$ 4.59            |

Table 2: ASL measurements in wild-type swine *ex vivo*

| Group                                                        | ASL layer height ( $\mu\text{m}$ ) mean $\pm$ SEM |                       |                               |                       |                                |                       |                                |
|--------------------------------------------------------------|---------------------------------------------------|-----------------------|-------------------------------|-----------------------|--------------------------------|-----------------------|--------------------------------|
|                                                              | Initial (-3 min)                                  | 6 min                 | $\Delta$ height (-3 to 6 min) | 12 min                | $\Delta$ height (-3 to 12 min) | 18 min                | $\Delta$ height (-3 to 18 min) |
| HTS<br>n=45                                                  | 93.61<br>$\pm$ 5.83                               | 99.42<br>$\pm$ 5.97   | 5.81<br>$\pm$ 0.63            | 105.53<br>$\pm$ 5.78  | 11.92<br>$\pm$ 0.58            | 112.53<br>$\pm$ 5.80  | 18.92<br>$\pm$ 0.74            |
| ITS<br>n=49                                                  | 84.14<br>$\pm$ 4.17                               | 86.70<br>$\pm$ 4.28   | 2.55<br>$\pm$ 0.37            | 91.46<br>$\pm$ 4.27   | 7.32<br>$\pm$ 0.46             | 95.54<br>$\pm$ 4.25   | 11.39<br>$\pm$ 0.59            |
| Control<br>n=12                                              | 71.53<br>$\pm$ 7.60                               | 73.65<br>$\pm$ 7.56   | 2.12<br>$\pm$ 0.41            | 79.33<br>$\pm$ 7.41   | 7.80<br>$\pm$ 0.46             | 82.76<br>$\pm$ 7.34   | 11.23<br>$\pm$ 0.81            |
| HTS+Amiloride<br>n=12                                        | 100.77<br>$\pm$ 15.48                             | 106.60<br>$\pm$ 15.81 | 5.83<br>$\pm$ 1.65            | 111.71<br>$\pm$ 15.62 | 10.94<br>$\pm$ 1.14            | 119.73<br>$\pm$ 14.83 | 18.96<br>$\pm$ 1.81            |
| HTS+Lido+TTX<br>n=18                                         | 100.50<br>$\pm$ 5.97                              | 105.36<br>$\pm$ 5.70  | 4.86<br>$\pm$ 1.06            | 108.27<br>$\pm$ 5.55  | 7.78<br>$\pm$ 1.20             | 113.13<br>$\pm$ 5.99  | 12.64<br>$\pm$ 1.06            |
| ITS+Lido+TTX<br>n=9                                          | 109.47<br>$\pm$ 17.03                             | 112.39<br>$\pm$ 17.43 | 2.92<br>$\pm$ 1.46            | 115.31<br>$\pm$ 17.54 | 5.83<br>$\pm$ 1.46             | 119.19<br>$\pm$ 16.91 | 9.72<br>$\pm$ 1.75             |
| HTS+172<br>n=59                                              | 89.56<br>$\pm$ 4.33                               | 93.37<br>$\pm$ 4.35   | 3.81<br>$\pm$ 0.44            | 97.67<br>4.29         | 8.11<br>$\pm$ 0.46             | 102.88<br>$\pm$ 4.30  | 13.32<br>$\pm$ 0.50            |
| ITS+172<br>n=29                                              | 85.58<br>$\pm$ 5.49                               | 87.39<br>$\pm$ 5.46   | 1.81<br>$\pm$ 0.55            | 88.77<br>$\pm$ 5.49   | 3.20<br>$\pm$ 0.62             | 90.71<br>$\pm$ 5.57   | 5.13<br>$\pm$ 0.63             |
| HTS+172+Lido+TTX<br>n=9                                      | 88.21<br>$\pm$ 8.11                               | 91.13<br>$\pm$ 8.46   | 2.92<br>$\pm$ 1.46            | 93.07<br>$\pm$ 9.20   | 4.86<br>$\pm$ 1.54             | 95.99<br>$\pm$ 8.00   | 7.78<br>$\pm$ 0.97             |
| ITS+172+Lido+TTX<br>n=21                                     | 86.67<br>$\pm$ 6.83                               | 88.75<br>$\pm$ 6.76   | 2.08<br>$\pm$ 0.83            | 90.83<br>$\pm$ 6.63   | 4.17<br>$\pm$ 0.98             | 92.50<br>$\pm$ 6.52   | 5.83<br>$\pm$ 1.10             |
| HTS+NK-1 blocker<br>n=36                                     | 112.79<br>$\pm$ 10.48                             | 118.23<br>$\pm$ 10.40 | 5.44<br>$\pm$ 0.60            | 123.33<br>$\pm$ 10.51 | 10.55<br>$\pm$ 1.07            | 128.17<br>$\pm$ 10.75 | 15.39<br>$\pm$ 1.16            |
| ITS+NK-1 blocker<br>n=16                                     | 71.48<br>$\pm$ 7.46                               | 75.30<br>$\pm$ 7.37   | 3.83<br>$\pm$ 1.12            | 80.77<br>$\pm$ 7.38   | 0.30<br>$\pm$ 0.70             | 83.51<br>$\pm$ 7.75   | 12.03<br>$\pm$ 1.57            |
| HTS+172+NK-1 blocker<br>n=10                                 | 88.73<br>$\pm$ 7.74                               | 91.35<br>$\pm$ 7.74   | 2.63<br>$\pm$ 1.34            | 96.60<br>$\pm$ 7.56   | 7.88<br>$\pm$ 0.88             | 101.85<br>$\pm$ 7.58  | 13.13<br>$\pm$ 1.96            |
| ITS+172+NK-1 blocker<br>n=17                                 | 113.75<br>$\pm$ 13.61                             | 115.29<br>$\pm$ 13.68 | 1.54<br>$\pm$ 0.83            | 117.35<br>$\pm$ 13.86 | 3.60<br>$\pm$ 1.08             | 119.41<br>$\pm$ 13.94 | 5.66<br>$\pm$ 1.05             |
| HTS+Atropine<br>n=22                                         | 104.71<br>$\pm$ 6.71                              | 108.29<br>$\pm$ 6.71  | 3.58<br>$\pm$ 0.94            | 112.66<br>$\pm$ 6.63  | 7.96<br>$\pm$ 1.14             | 117.44<br>$\pm$ 6.94  | 12.73<br>$\pm$ 1.49            |
| ITS+Atropine<br>n=11                                         | 96.93<br>$\pm$ 10.42                              | 100.90<br>$\pm$ 11.36 | 3.98<br>$\pm$ 1.38            | 105.68<br>$\pm$ 11.12 | 8.75<br>$\pm$ 1.18             | 109.65<br>$\pm$ 10.98 | 12.73<br>$\pm$ 1.38            |
| HTS+172+Atropine<br>n=18                                     | 98.02<br>$\pm$ 6.92                               | 100.93<br>$\pm$ 7.23  | 2.92<br>$\pm$ 1.00            | 104.34<br>$\pm$ 6.66  | 6.32<br>$\pm$ 1.19             | 107.25<br>$\pm$ 6.71  | 9.24<br>$\pm$ 1.32             |
| ITS+172+Atropine<br>n=19                                     | 92.11<br>$\pm$ 9.13                               | 93.03<br>$\pm$ 9.28   | 0.92<br>$\pm$ 0.63            | 95.33<br>$\pm$ 9.67   | 3.22<br>$\pm$ 1.00             | 97.63<br>$\pm$ 9.40   | 5.53<br>$\pm$ 1.20             |
| HTS+Bumet+NA+172+HCO <sub>3</sub> <sup>-</sup> -free<br>n=24 | 97.34<br>$\pm$ 4.99                               | 99.71<br>$\pm$ 4.93   | 2.37<br>$\pm$ 0.56            | 103.21<br>$\pm$ 5.01  | 5.87<br>$\pm$ 0.72             | 106.53<br>$\pm$ 5.05  | 9.19<br>$\pm$ 0.69             |
| ITS+Bumet+NA+172+HCO <sub>3</sub> <sup>-</sup> -free<br>n=18 | 120.90<br>$\pm$ 12.78                             | 122.16<br>$\pm$ 12.81 | 1.26<br>$\pm$ 0.20            | 123.67<br>$\pm$ 12.80 | 2.77<br>$\pm$ 0.29             | 125.13<br>$\pm$ 12.77 | 4.23<br>$\pm$ 0.50             |

Table 3: ASL measurements in CFTR<sup>-/-</sup> swine *ex vivo*

| Group                    | ASL layer height (μm) Mean ± SEM |                   |                       |                   |                        |                   |                        |
|--------------------------|----------------------------------|-------------------|-----------------------|-------------------|------------------------|-------------------|------------------------|
|                          | Initial (-3 min)                 | 6 min             | Δheight (-3 to 6 min) | 12 min            | Δheight (-3 to 12 min) | 18 min            | Δheight (-3 to 18 min) |
| HTS<br>n=6               | 226.04<br>± 77.65                | 234.79<br>± 80.18 | 8.75<br>± 5.53        | 261.04<br>± 78.08 | 35.00<br>± 7.14        | 268.33<br>± 78.25 | 42.29<br>± 8.28        |
| ITS<br>n=4               | 144.38<br>± 16.17                | 146.56<br>± 15.72 | 2.19<br>± 2.19        | 148.75<br>± 15.16 | 4.38<br>± 2.53         | 155.31<br>± 19.03 | 10.94<br>± 4.19        |
| HTS+Lido+TTX+Atro<br>n=4 | 137.81<br>± 32.03                | 142.19<br>± 29.54 | 4.38<br>± 2.53        | 148.75<br>± 30.52 | 10.94<br>± 2.19        | 161.88<br>± 28.24 | 24.06<br>± 5.51        |
